# Supplementary material for: Knowledge, attitudes and practices related to tuberculosis in pharmacy workers in a cross-sectional survey in El Agustino, Peru
Source: PubMed Central journal article supplement (PMC6057627; doi:10.1371/journal.pone.0196648), 2018-07-24
Supplement: pone.0196648.s002.pdf [file pone.0196648.s002.pdf]

Código \_\_\_\_\_

Fecha \_\_\_\_/\_\_\_\_/\_\_\_\_201\_\_  
mes día año

Hora \_\_\_\_\_

**ENCUESTA SOBRE TUBERCULOSIS Y USO DE TECNOLOGIAS DE LA INFORMACIÓN Y COMUNICACIÓN EN EL AGUSTINO PARA PERSONAL DE FARMACIAS Y BOTICAS**

**Estimado (a) participante estamos tratando de determinar cuáles son los conocimientos, actitudes y practicas del personal que trabaja en farmacias y boticas con respecto a tuberculosis y uso de tecnologías de la información y comunicación. Esta encuesta es totalmente anónima, los resultados del trabajo se analizarán y se publicarán y esperamos nos permitirán guiar futuras actividades de capacitación. Les agradecemos su participación y respuestas sinceras.**

**SECCION 1**

101. ¿Qué tipo de establecimiento es?

1.  Botica  
2.  Farmacia

102.- ¿Pertenece el establecimiento a una cadena de boticas y/o farmacia?

1.  Si  
2.  No

103.- Nombre del establecimiento \_\_\_\_\_

104.- Dirección del establecimiento \_\_\_\_\_

105. Referencia \_\_\_\_\_

106.- ¿Qué días y en que horario atiende?

| Día    | Horario         | Desde | horas | Hasta | horas |
|--------|-----------------|-------|-------|-------|-------|
| 106.1. | Lunes a Viernes |       |       |       |       |
| 106.2. | Sábados         |       |       |       |       |
| 106.3. | Domingos        |       |       |       |       |

|      |                                                                                    |                                                                          |
|------|------------------------------------------------------------------------------------|--------------------------------------------------------------------------|
| 107. | ¿Cuántos turnos al día atiende la botica o farmacia?                               | _____                                                                    |
| 108. | ¿Cuántas horas dura cada turno en promedio?                                        | _____ horas                                                              |
| 109. | ¿Cuántos trabajadores atienden clientes por turno en promedio?                     | _____ trabajadores                                                       |
| 110. | ¿Cuántos trabajadores atienden clientes en el establecimiento en todos los turnos? | _____ trabajadores en total                                              |
| 111. | ¿Cuál es el número de trabajadores en la botica o farmacia según profesión?        | 1. Químico farmacéutico ( )<br>2. Técnico de farmacia ( )<br>3. Otro ( ) |
| 112. | ¿Cuántos clientes atiende la botica o farmacia durante un turno en promedio?       | _____ clientes                                                           |

106. ¿Cuál es el género del encuestado?

1.  Mujer 2.  Hombre

107. ¿Cuántos años cumplidos tiene?  años

108.- ¿En la farmacia o botica donde trabaja, usted es propietario?

1.  No 2.  Si

**Continúe en la siguiente pagina →**

116. ¿En la farmacia o botica donde trabaja, usted es ...? **[Marque solo una respuesta]**

1.  Químico farmacéutico(a)                      3.  Técnico de farmacia  
2.  Dependiente (sin estudio de farmacia)      88.  Otro(s) Especifique:

\_\_\_\_\_

Piense en un grupo de 10 clientes que ha atendido hoy día o ayer. De esos 10 clientes:

|                                                                                                                    | Número |
|--------------------------------------------------------------------------------------------------------------------|--------|
| 117. ¿Cuántos preguntaron algo y no compraron nada?                                                                |        |
| 118. ¿Cuántos compraron algún medicamento con receta?                                                              |        |
| 119. ¿Cuántos compraron algún medicamento sin receta?                                                              |        |
| 120. ¿Cuántos compraron algún producto o servicio no relacionado a salud? ejemplo recarga de crédito para llamadas |        |
| 121. ¿Cuántos compraron algún producto o servicio relacionado a salud que no es medicamento? ejemplo pañales       |        |

## SECCION 2

201. Marque el tiempo que lleva aproximadamente trabajando en farmacias o boticas en general?  
(Convertir el tiempo a meses)\_\_\_\_\_ meses

202. Antes de comenzar a trabajar en esta botica o farmacia, ¿Recibió alguna capacitación de la misma botica o farmacia?

1.  Si                      2.  no

203. En los últimos 12 meses, ¿Ha recibido alguna capacitación en algún tema relacionado a salud?

1.  Si  
2.  No – IR A LA 206

204. ¿De quién recibió la capacitación? **Puede marcar más de una opción.**

1.  Empleador/ dueño  
2.  Ministerio de salud  
3.  Municipio  
4.  Universidad  
5.  Laboratorio farmacéutico  
88. Otra entidad (especifique por favor)\_\_\_\_\_

205. ¿De qué tema trató la capacitación? **Puede marcar más de una opción.**

1.  Productos farmacéuticos  
2.  Diagnóstico de enfermedades frecuentes  
3.  Manejo de enfermedades frecuentes  
88.  Otro tema (especifique por favor)\_\_\_\_\_

206. ¿Si un cliente con tos productiva (con flema) por más de 15 días viene a la farmacia que le recomienda usted? Sólo debe marcar una alternativa

**NO LEER LAS ALTERNATIVAS**

1.  Venderle un producto que le calme la tos  
2.  Venderle un antibiótico  
3.  Recomendarle que vaya al centro de salud  
4.  Decirle que tiene tuberculosis  
5.  No sabe

207. ¿Cuál es la molestia o el tema que más le consultan los clientes?

1.  Problemas respiratorios como resfrío, tos
2.  Problemas digestivos como diarrea o dolor abdominal
3.  Problemas de la piel
4.  Dolor de cabeza, músculos o articulaciones
5.  Problemas genitourinarios
88.  Otro problema (especifique por favor)\_\_\_\_\_

**¿Tiene oportunidad de realizar las siguientes actividades en su trabajo?**

208. ¿Tiene oportunidad de conversar con el cliente sobre su molestia o enfermedad?

1.  No (IR A 211)      2.  Si

209. ¿Si tiene oportunidad de hacerlo que tanto le gusta conversar con los clientes sobre su molestia o enfermedad?

1.  Me gusta mucho
2.  Me gusta poco
3.  Me gusta muy poco
4.  No me gusta

210. ¿Cuántas veces al día puede conversar con los clientes sobre su molestia o enfermedad?

\_\_\_\_\_

211. ¿Qué lo limita para conversar con los clientes sobre sus molestias más frecuentemente?

Puede marcar más de una alternativa

1.  Tengo poco tiempo
2.  No me siento capacitado para eso
3.  Necesito pedir permiso a alguien
4.  No tengo limitaciones
5.  Otro problema (especifique por favor)\_\_\_\_\_

212. ¿Tiene oportunidad de darle al cliente recomendaciones sobre su tratamiento?

1.  No (IR A 215)      2.  Si

213. ¿Si tiene oportunidad de hacerlo que tanto le gusta dar recomendaciones de tratamiento?

1.  Me gusta mucho
2.  Me gusta poco
3.  Me gusta muy poco
4.  No me gusta

214. ¿Cuántas veces al día puede dar recomendaciones a los clientes sobre su tratamiento?

\_\_\_\_\_

215. ¿Qué lo limita a dar recomendaciones a los clientes sobre su tratamiento más frecuentemente?

Puede marcar más de una alternativa

1.  Tengo poco tiempo
2.  No me siento capacitado para eso
3.  Necesito pedir permiso a alguien
4.  No tengo limitaciones
5.  Otro problema (especifique por favor)\_\_\_\_\_

216. ¿Tiene oportunidad de enseñarle al cliente a usar algún producto, ejemplo inhalador?  
1.  No (IR A 219)      2.  Si

217. ¿Si tiene oportunidad de hacerlo que tanto le gusta enseñar a usar un producto?  
1.  Me gusta mucho  
2.  Me gusta poco  
3.  Me gusta muy poco  
4.  No me gusta

218. ¿Cuántas veces al día puede enseñarle al cliente a usar un producto?  
\_\_\_\_\_

219. ¿Qué lo limita a enseñarle al cliente a usar un producto más frecuentemente?  
Puede marcar más de una alternativa  
1.  Tengo poco tiempo  
2.  No me siento capacitado para eso  
3.  Necesito pedir permiso a alguien  
4.  No tengo limitaciones  
5.  Otro problema (especifique por favor) \_\_\_\_\_

220. ¿Con qué frecuencia recomienda al cliente acudir al médico o centro de salud?  
1.  Nunca      2.  Pocas veces      3.  Frecuentemente

### SECCION 3

301. ¿Ha escuchado hablar acerca de la tuberculosis?  
1.  No      2.  Si

302. ¿Qué tan informado se considera usted respecto a la tuberculosis?  
1.  Muy bien informado  
2.  Bien informado  
3.  Poco informado  
4.  Nada informado

303. ¿Cómo se sentiría Ud. al hablar acerca de **tuberculosis** con sus clientes?  
1.  Muy cómodo (a)      4.  Muy incómodo  
2.  Cómodo      5.  No sabe  
3.  Incómodo

304. ¿Ha tenido o tiene a alguien cercano a Ud. (por ejemplo: familiar, amigo o conocido cercano) que haya enfermado de Tuberculosis?  
1.  No      2.  Si      88.  No sabe

305. ¿Es la Tuberculosis una enfermedad contagiosa?  
1.  No es contagiosa  
2.  Es poco contagiosa  
3.  Es muy contagiosa  
4.  No sé.

306. ¿Cómo se contagia la tuberculosis? Marcar **TODO** lo que responde **NO LEER LAS ALTERNATIVAS**.

1.  Por darle la mano a un paciente con TBC
2.  Por el aire cuando la persona con TBC tose o estornuda
3.  Al tocar los mismos objetos que toco una persona con TBC
4.  Al usar el mismo baño que una persona con TBC
5.  Por contacto sexual
6.  Por la sangre
7.  Otra (especifique por favor) \_\_\_\_\_
88.  No sabe

307. ¿Cómo puede una persona evitar el contagio de tuberculosis? Marcar **TODO** lo que responde **NO LEER LAS ALTERNATIVAS**.

1.  Evitar saludar dando la mano
2.  Cubriéndose la boca o la nariz al toser o estornudar
3.  Evitar compartir los cubiertos y platos
4.  Con una buena nutrición
5.  Viajando con las ventanas abiertas en el bus
6.  Otra (especifique por favor) \_\_\_\_\_
88.  No sabe

308. ¿Todas las personas que tienen TBC tienen síntomas?

1.  Sí.
2.  No.
88.  No sabe.

309. ¿Cuál es el síntoma más común de TBC?

**NO LEER LAS ALTERNATIVAS**

1.  Fiebre.
2.  Tos.
3.  Estornudos.
4.  Cansancio.
5.  Dolor de pecho.
6.  Pérdida de peso
7.  Otra (especifique por favor) \_\_\_\_\_
88.  No sabe

310. ¿Cuál es el mejor método para saber si alguien tiene TBC? **LEER LAS ALTERNATIVAS**

1.  Examen de una muestra de esputo (flema)
2.  PPD (inyectar una sustancia en la piel y ver si se forma una pequeña ampolla).
3.  Radiografía (del pecho).
4.  Cultivo de muestra sanguínea.
5.  Otro (especifique por favor) \_\_\_\_\_
88.  No sabe

311. ¿La TBC puede curarse?

1.  Siempre
2.  Casi siempre.
3.  Casi la mitad de las veces
4.  Casi nunca.
5.  Nunca
88.  No sabe

312. ¿Qué pasa si una persona con TBC no toma su tratamiento correctamente o toma tratamiento incompleto? Marque todas las alternativas que considere **LEER LAS ALTERNATIVAS**

- 1.  Hará TBC resistente a medicamentos.
- 2.  Contagiará a otras personas.
- 3.  Desarrollará TBC en sitios fuera del pulmón.
- 4.  Todas las anteriores.
- 88.  No sabe.

313. ¿Cuál es la mejor forma en que puede curarse una persona con tuberculosis? **LEER LAS ALTERNATIVAS**

- 1.  Medicina natural, plantas medicinales
- 2.  Buena nutrición
- 3.  Combinación de medicamentos que da el centro de salud
- 4.  Medicinas que se pueden comprar en farmacias
- 5.  Otra (especifique por favor) \_\_\_\_\_
- 88.  No sabe

#### SECCIÓN 4

Para cada una de las afirmaciones acerca de la *tuberculosis* en la tabla que se presenta a continuación señale cual es su actitud marcando una de las alternativas siguientes: “Totalmente de acuerdo”, “De acuerdo”, “En desacuerdo”, “Totalmente en desacuerdo”, “No se”

|                                                                                            | 1.Totalmente de acuerdo  | 2.De acuerdo             | 3.En desacuerdo          | 4.Totalmente en desacuerdo | 5. No se                 |
|--------------------------------------------------------------------------------------------|--------------------------|--------------------------|--------------------------|----------------------------|--------------------------|
| 401. La tuberculosis es frecuente en el Perú                                               | <input type="checkbox"/> | <input type="checkbox"/> | <input type="checkbox"/> | <input type="checkbox"/>   | <input type="checkbox"/> |
| 402. La tuberculosis es frecuente en El Agustino                                           | <input type="checkbox"/> | <input type="checkbox"/> | <input type="checkbox"/> | <input type="checkbox"/>   | <input type="checkbox"/> |
| 403. La tuberculosis puede causar la muerte                                                | <input type="checkbox"/> | <input type="checkbox"/> | <input type="checkbox"/> | <input type="checkbox"/>   | <input type="checkbox"/> |
| 404. Encontrar todos los casos nuevos de tuberculosis es importante para controlarla       | <input type="checkbox"/> | <input type="checkbox"/> | <input type="checkbox"/> | <input type="checkbox"/>   | <input type="checkbox"/> |
| 405. Es importante involucrar a la comunidad en el control y prevención de la tuberculosis | <input type="checkbox"/> | <input type="checkbox"/> | <input type="checkbox"/> | <input type="checkbox"/>   | <input type="checkbox"/> |
| 406. La tuberculosis resistente al tratamiento es un problema grave en el Perú:            | <input type="checkbox"/> | <input type="checkbox"/> | <input type="checkbox"/> | <input type="checkbox"/>   | <input type="checkbox"/> |

407. En la comunidad, ¿cómo nota Ud. que se trata a la gente con Tuberculosis generalmente?

#### LEER LAS ALTERNATIVAS

- 1.  La mayoría de la gente los apoya
- 2.  La mayoría de la gente la rechaza
- 3.  La mayoría de la gente la apoya, pero se aleja de ellos
- 4.  La gente los trata con indiferencia
- 5.  La gente los trata igual que a los que no tienen TBC

## SECCIÓN 5.

501. ¿Le gustaría recibir información sobre la tuberculosis y participar en prevención y control en tu comunidad?

1.  No (IR A 503)    2.  Si

502. ¿Por qué medio le gustaría recibir información sobre la tuberculosis? **Puede marcar más de una opción**

1.  Charla  
2.  volante  
3.  Por celular (mensaje de texto)  
4.  Por internet (correo electrónico)  
88. Otro (especifique por favor) \_\_\_\_\_

503. ¿Cuál de los siguientes equipos tiene usted para uso personal? **Puede marcar más de una opción**

1.  celular tipo smartphone  
2.  celular que no es smartphone  
3.  tablet  
4.  laptop  
5.  computadora de escritorio  
88.  Otro (especifique por favor) \_\_\_\_\_

504. ¿Dónde tiene conexión a internet? **Puede marcar más de una opción**

1.  En mi casa  
2.  Cabina de internet pública  
3.  En la farmacia  
4.  En mi celular  
5.  No tengo acceso a internet – IR A LA 506

505. ¿Para que utiliza el Internet? **Puede marcar más de una opción**

1.  email  
2.  chat  
3.  ver videos  
4.  juegos  
5.  información del trabajo  
6.  otro tipo de información  
7.  red social (ejemplo Facebook)  
8.  Otro (especifique por favor) \_\_\_\_\_

506.- ¿Le gustaría participar en una reunión almuerzo de conversación o grupo focal sobre el tema de Tuberculosis y las farmacias cerca de su establecimiento?

1.  Si  
2.  No

507.- número de celular / RPM /RPC \_\_\_\_\_

508.- Correo electrónico \_\_\_\_\_

**MUCHAS GRACIAS POR PARTICIPAR**
